# Supplementary material for: Spatial Downscaling of MODIS Snow Cover Observations Using Sentinel-2 Snow Products
Source: MDPI journal article supplement (doi:10.3390/rs13224513), 2021-11-10
Supplement: s1 [file s1]

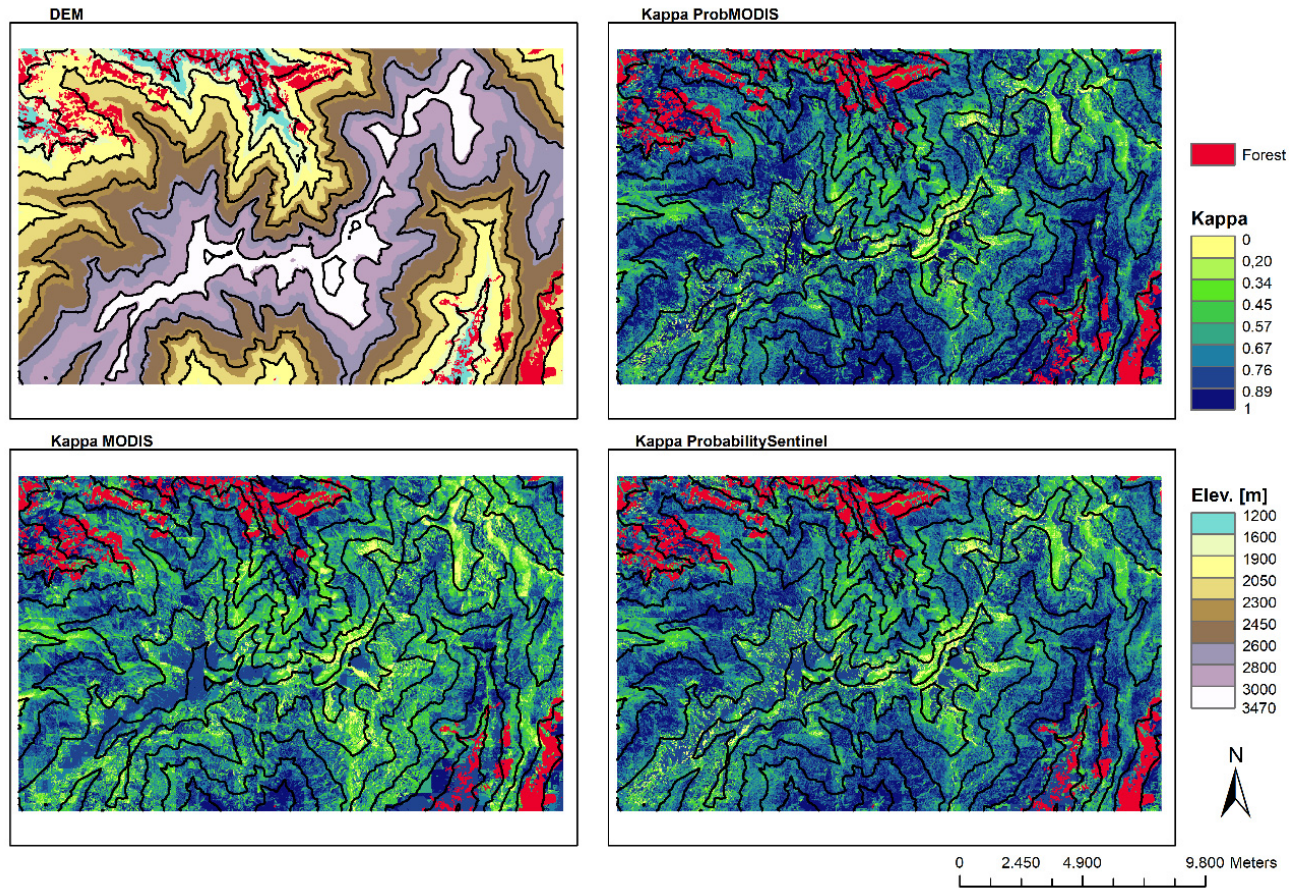

**Figure S1.** Spatial distribution of *Kappa* coefficients obtained in Picos de Europa for the *BinMODIS<sub>20m</sub>* (bottom left panel), *ProbMODIS* (upper right panel) and *ProbSentinel* (bottom right panel) methods. In the upper left panel, the DEM of this test area is included for easier interpretation of the results. Forested areas are masked in red.

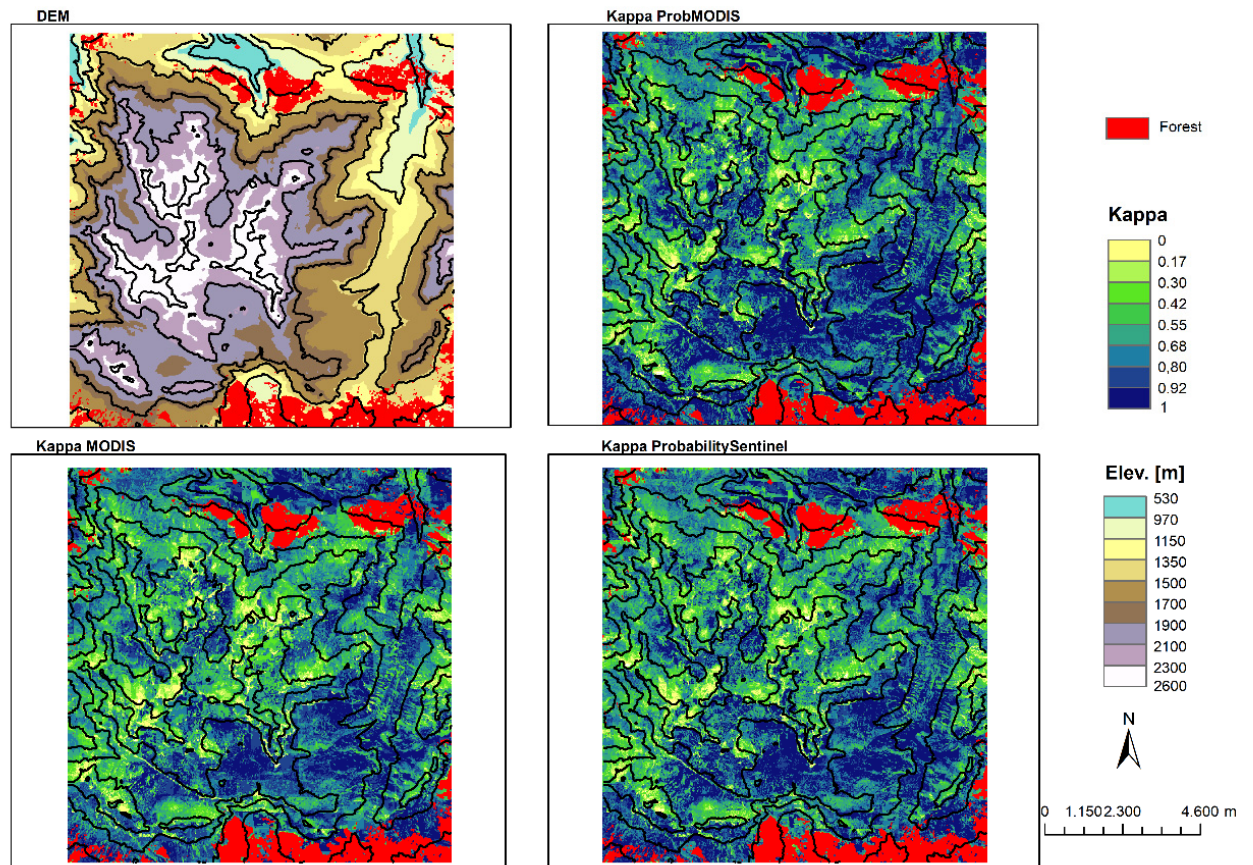

**Figure S2.** Spatial distribution of *Kappa* coefficients obtained in Sierra Nevada for the *BinMODIS<sub>20m</sub>* (bottom left panel), *ProbMODIS* (upper right panel) and *ProbSentinel* (bottom right panel) methods. In the upper left panel, the DEM of this test area is included for easier interpretation of the results. Forested areas are masked in red.
